# Supplementary material for: Properties of compressible elastica from relativistic analogy
Source: Royal Society of Chemistry journal article supplement (doi:10.1039/c5sm02447a), 2015-11-05
Supplement: c5sm02447a1.pdf [file c5sm02447a1.pdf]

Supplementary Material (ESI) for Soft Matter

## Analogy between compressible 3D Kirchhoff's rod and relativistic rotor

By Oz Oshri and Haim Diamant

In this supplementary document we derive the equations of equilibrium for a 3D compressible elastic rod under the assumptions of Kirchhoff's model [1, 2]. It is shown that these equations are mathematically analogous to the 3D Euler's equations of rigid-body rotation, where the non-relativistic angular momentum,  $\mathbf{L}$ , is replaced by,  $\gamma\mathbf{L}$ ,  $\gamma$  being the Lorentz factor. This analogy is derived while keeping in mind the known difficulties in the latter, relativistic problem [3, 4].

Following the formulation in ref. [5], we consider a space curve described by the position vector,  $\mathbf{R}(s)$ , where  $s$  is the arclength parameter of the relaxed configuration. Defining  $\hat{s}$  as the arclength parameter of the deformed configuration, the unit tangent vector to  $\mathbf{R}(s)$  is given by,  $\mathbf{d}_3 = d\mathbf{R}/d\hat{s}$ . In addition, let  $\{\mathbf{d}_1, \mathbf{d}_2\}$  be a pair of unit vectors perpendicular to  $\mathbf{d}_3$  and parallel to the principal axes of the filament's cross-section. The triad  $\{\mathbf{d}_1, \mathbf{d}_2, \mathbf{d}_3\}$  form a co-moving coordinate frame attached to the rod's mid-axis. These vectors satisfy the relations,

$$\frac{d\mathbf{d}_i}{ds} = \gamma\boldsymbol{\kappa} \times \mathbf{d}_i, \quad (1)$$

where  $i = 1, 2, 3$ ,  $\gamma = d\hat{s}/ds$  is the strain field, and  $\boldsymbol{\kappa} = \kappa_1\mathbf{d}_1 + \kappa_2\mathbf{d}_2 + \kappa_3\mathbf{d}_3$  is the curvature vector. The local bending moment is given by,

$$\mathbf{M}(s) = B_1(\gamma\kappa_1)\mathbf{d}_1 + B_2(\gamma\kappa_2)\mathbf{d}_2 + B_3(\gamma\kappa_3)\mathbf{d}_3, \quad (2)$$

where  $B_i$  are bending rigidities.

In correspondence with eqn (1) of the main text, the energy functional of a 3D elastic filament, confined by a boundary constant force  $\mathbf{P}$ , is given by  $E = \int_0^L e[\boldsymbol{\kappa}(s), \gamma(s)]ds$ , where

$$e[\boldsymbol{\kappa}(s), \gamma(s)] = \frac{1}{2}\mathbf{M} \cdot (\gamma\boldsymbol{\kappa}) + \frac{Y}{2}(\gamma - 1)^2 + \gamma\mathbf{d}_3 \cdot \mathbf{P}. \quad (3)$$

The appearance of the  $\gamma\boldsymbol{\kappa}$  term in the bending energy is a consequence of the requirement to keep bending and compression contributions independent. Minimizing eqn (3) with respect to  $\gamma$  and  $\kappa_i$  (keeping in mind that  $\kappa_i$  are not independent) gives [5],

$$\frac{d\mathbf{M}}{d\hat{s}} - \mathbf{d}_3 \times \mathbf{P} = 0, \quad (4)$$

$$Y(\gamma - 1) + \mathbf{d}_3 \cdot \mathbf{P} = 0. \quad (5)$$

In the incompressible limit eqn (5) is redundant and equations (4) become analogous to the non-relativistic Euler equations of a 3D rigid body, fixed at one point and rotating under the influence of an external force (such as gravity) [6, p. 200]. In this analogy, the bending moment takes the role of angular momentum,  $\mathbf{M} \leftrightarrow \mathbf{L}$ , and the boundary force is analogous to an external torque,  $\mathbf{d}_3 \times \mathbf{P} \leftrightarrow \mathbf{N}$ . Turning on compressibility effects, we have by eqn (2) that  $\mathbf{M} \rightarrow \gamma\mathbf{M}$ . Thus, it is left to show that  $\gamma$  coincides with the Lorentz factor. First integration of equations (4) and (5) gives,

$$\mathcal{H} = \frac{1}{2}\mathbf{M} \cdot (\gamma\boldsymbol{\kappa}) - \frac{Y}{2}(\gamma - 1)^2 - \gamma\mathbf{d}_3 \cdot \mathbf{P} = \text{const.} \quad (6)$$

Eliminating  $\mathbf{d}_3 \cdot \mathbf{P}$  from eqn (6) and substituting in eqn (5) gives,

$$\gamma = \frac{\sqrt{1 + 2\mathcal{H}/Y}}{\sqrt{1 + \frac{B_1}{Y}\kappa_1^2 + \frac{B_2}{Y}\kappa_2^2 + \frac{B_3}{Y}\kappa_3^2}}. \quad (7)$$

This expression indeed resembles the Lorentz factor up to the constant prefactor,  $\gamma_0 \equiv \sqrt{1 + 2\mathcal{H}/Y}$ , which appears also in the 2D problem, and which can be absorbed in the force  $\mathbf{P}$ , (see discussion in the main text).

## References

- [1] E. H. Dill, Arch. Hist. Exact. Sci., 1992, **44**, 2-23.
- [2] M. Nizette and A. Goriely, J. Math. Phys., 1999, **40**, 2830-2866.
- [3] G. Rizzi, and M. L. Ruggiero, *Relativity in Rotating Frames*, Kluwer Academic, Dordrecht, The Netherlands (2004).
- [4] R. Rynasiewicz, Philosophy of Science, 2000, **67**, 70-93.
- [5] S. Lafortune, A. Goriely, M. Tabor, J. Nonlinear Dyn., 2005, **43**, 173-195.
- [6] H. Goldstein, C. Poole, J. Safko, *Classical Mechanics*, 3rd edition, Addison-Wesley (2002).
